# Supplementary material for: CFD Analysis and Life Cycle Assessment of Continuous Synthesis of Magnetite Nanoparticles Using 2D and 3D Micromixers
Source: MDPI journal article supplement (doi:10.3390/mi13060970), 2022-06-19
Supplement: s1 [file s1]

## Supplementary Information

# 2D and 3D micromixers for the synthesis of magnetite nanoparticles: CFD analysis and life cycle assessment

Sergio Leonardo Florez <sup>1</sup>, Ana Lucia Campana <sup>1</sup>, M. Juliana Noguera <sup>1</sup>, Valentina Quezada <sup>2</sup>, Olga P. Fuentes <sup>1</sup>, Juan C. Cruz <sup>2</sup> and Johann F. Osma <sup>1,\*</sup>

<sup>1</sup> Department of Electrical and Electronic Engineering, Universidad de los Andes, Cra. 1E No. 19a-40, Bogota 111711, Colombia; [sl.florez10@uniandes.edu.co](mailto:sl.florez10@uniandes.edu.co) (S.L.F.); [al.campana10@uniandes.edu.co](mailto:al.campana10@uniandes.edu.co) (A.L.C.); [mj.noguera10@uniadnes.edu.co](mailto:mj.noguera10@uniadnes.edu.co) (M.J.N.); [op.fuentes@uniandes.edu.co](mailto:op.fuentes@uniandes.edu.co) (O.P.F.)

<sup>2</sup> Department of Biomedical Engineering, Universidad de Los Andes, Cra. 1E No. 19a-40, Bogota 111711, Colombia; [v.quezada@uniandes.edu.co](mailto:v.quezada@uniandes.edu.co) (V.Q.); [jc.cruz@uniandes.edu.co](mailto:jc.cruz@uniandes.edu.co) (J.C.C.)

\* Correspondence: [jf.osma43@uniandes.edu.co](mailto:jf.osma43@uniandes.edu.co); Tel.: +57-1-339-4949

## Supplementary Figures

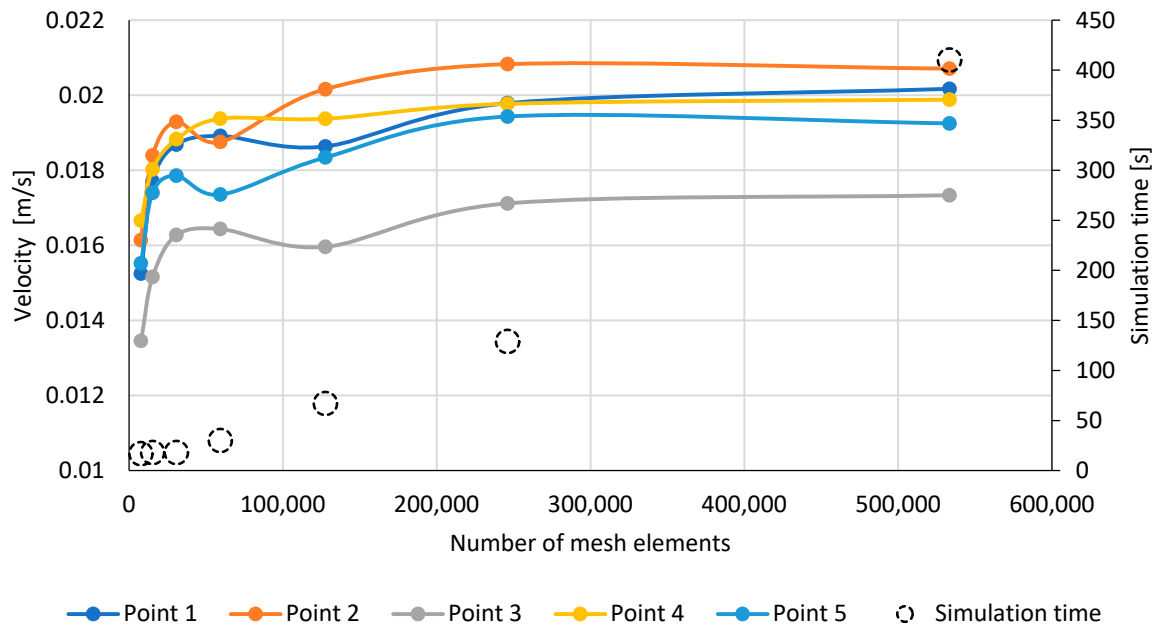

**Figure S1.** Mesh Convergence analysis for the Serpentine-based mixer.

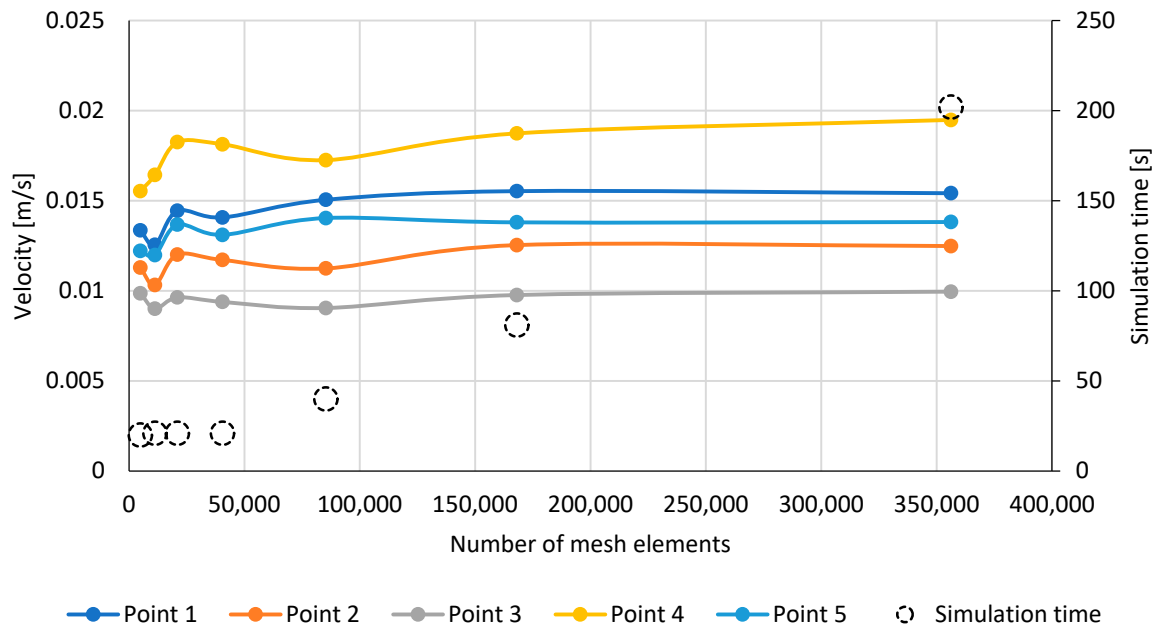

Figure S2. Mesh convergence analysis for the Triangular-based mixer.

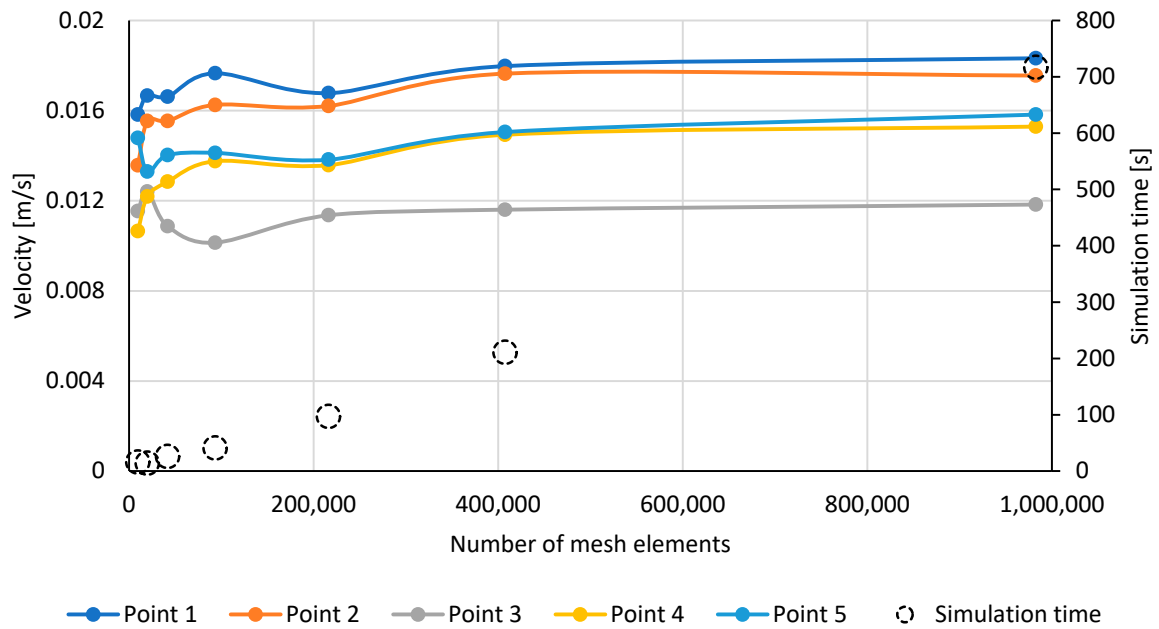

Figure S3. Mesh Convergence analysis for 3D-based mixer.
